# Supplementary material for: Applying Modified VP53A Recombinant Protein as an Anti-White Spot Syndrome Virus Biological Agent in Litopenaeus vannamei Farming
Source: MDPI journal article supplement (doi:10.3390/v14071353), 2022-06-21

**Supplementary Figure S1.** Non-metric multidimensional scaling plot of samples for ASV dataset. Each point is a sample [B group (purple), C group (green), and P group (red)], and the distance between points is proportional to the multivariate difference between samples.

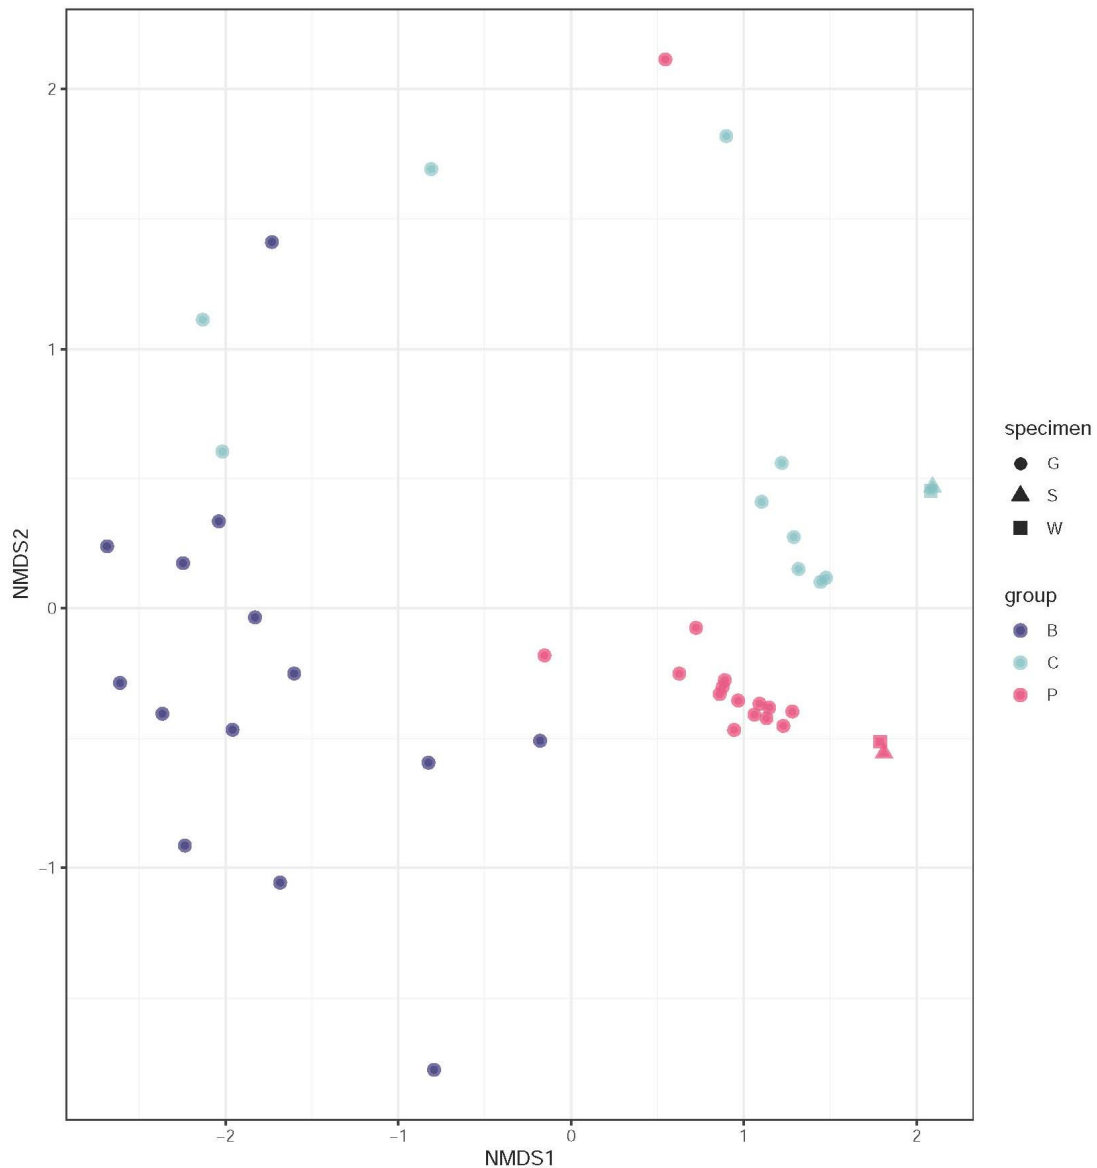

Supplement: s1 [file s1]
